# Supplementary material for: Bioactive Oxylipins Profile in Marine Microalgae
Source: MDPI journal article supplement (doi:10.3390/md21030136), 2023-02-22
Supplement: s1 [file s1]

# Supplementary Materials: Bioactive Oxylipins Profile in Marine Microalgae

All quantification of non-enzymatic and enzymatic oxygenated metabolites of omega-6 and 3 in Mi124, Mi133, Mi134, Mi136 and Mi168 are available as Supplementary Materials, Table S1 for oxygenated metabolites of omega-6 and Table S2 for oxygenated metabolites of omega-3. Data are mean  $\pm$  sd ( $n = 3$ ) expressed as ng/mg of dry weight biomass. ND for No Detected.

**Table S1.** Quantification of non-enzymatic and enzymatic oxygenated metabolites of omega-6 in Mi124, Mi133, Mi134, Mi136 and Mi168.

|     | Component Name                    | Mi124                 |         | Mi133                 |         | Mi134                 |         | Mi136                 |         | Mi168                 |         |
|-----|-----------------------------------|-----------------------|---------|-----------------------|---------|-----------------------|---------|-----------------------|---------|-----------------------|---------|
|     |                                   | Concentration (ng/mg) | ± SD    |
| LA  | 9-HODE                            | 37.10                 | ± 14.68 | 22.00                 | ± 4.86  | 1.71                  | ± 0.92  | 9.17                  | ± 3.88  | 0.03                  | ± 0.10  |
|     | 13-HODE                           | 108.44                | ± 27.71 | 27.29                 | ± 6.84  | 3.50                  | ± 1.60  | 12.81                 | ± 5.05  | 0.48                  | ± 0.16  |
|     | 5-HETE                            | 0.53                  | ± 0.06  | 66.92                 | ± 24.92 | 1.55                  | ± 0.67  | 5.11                  | ± 5.38  | 5.30                  | ± 0.65  |
|     | 8-HETE                            | 0.14                  | ± 0.03  | 41.50                 | ± 11.29 | 1.28                  | ± 0.37  | 3.36                  | ± 3.28  | 2.95                  | ± 0.68  |
|     | 12-HETE                           | 0.58                  | ± 0.07  | 50.96                 | ± 17.22 | 2.13                  | ± 0.75  | 4.45                  | ± 4.30  | 3.44                  | ± 0.88  |
|     | 15-HETE                           | 0.75                  | ± 0.09  | 53.72                 | ± 13.91 | 0.22                  | ± 0.09  | 1.00                  | ± 0.87  | 0.99                  | ± 0.05  |
|     | 5,6-DiHETE                        | ND                    | ± ND    | 0.07                  | ± 0.03  | ND                    | ± ND    | ND                    | ± ND    | ND                    | ± ND    |
|     | 5oxoETE                           | 0.07                  | ± 0.06  | 15.62                 | ± 4.72  | 0.30                  | ± 0.09  | 0.49                  | ± 0.47  | 0.51                  | ± 0.18  |
|     | 5,6-EET                           | ND                    | ± ND    | 6.67                  | ± 2.96  | 0.11                  | ± 0.02  | 0.19                  | ± 0.16  | 0.32                  | ± 0.04  |
|     | 11,12-EET                         | ND                    | ± ND    | 17.97                 | ± 5.90  | 0.14                  | ± 0.02  | 0.22                  | ± 0.23  | 0.23                  | ± 0.02  |
|     | 14,15-EET                         | 0.06                  | ± 0.01  | 14.35                 | ± 4.36  | 0.14                  | ± 0.03  | 0.23                  | ± 0.20  | 0.27                  | ± 0.02  |
|     | LTB4                              | ND                    | ± ND    | 0.39                  | ± 0.16  | ND                    | ± ND    | ND                    | ± ND    | ND                    | ± ND    |
| ARA | TXB2                              | ND                    | ± ND    | 0.07                  | ± 0.01  |
|     | PGE2                              | ND                    | ± ND    | 0.07                  | ± 0.03  | ND                    | ± ND    | ND                    | ± ND    | ND                    | ± ND    |
|     | PGF2α                             | ND                    | ± ND    | 0.34                  | ± 0.19  | ND                    | ± ND    | ND                    | ± ND    | ND                    | ± ND    |
|     | 8-iso-PGA2                        | ND                    | ± ND    | 0.16                  | ± 0.10  | ND                    | ± ND    | ND                    | ± ND    | ND                    | ± ND    |
|     | 15-d-PGJ2                         | 0.70                  | ± 0.68  | 0.31                  | ± 0.40  | 0.56                  | ± 0.16  | 1.09                  | ± 0.69  | 2.03                  | ± 1.00  |
|     | PGJ2                              | ND                    | ± ND    | 0.45                  | ± 0.23  | ND                    | ± ND    | ND                    | ± ND    | ND                    | ± ND    |
|     | 15-A <sub>2</sub> -IsoP           | 0.07                  | ± 0.02  | 0.03                  | ± 0.02  | ND                    | ± ND    | 0.18                  | ± 0.07  | 0.25                  | ± 0.06  |
|     | 5(RS)-5-F <sub>2</sub> -IsoP      | 0.01                  | ± <0.01 | 0.04                  | ± 0.02  | 0.10                  | ± 0.04  | 0.42                  | ± 0.30  | 0.17                  | ± 0.05  |
|     | 5(RS)-5-F <sub>2</sub> -IsoP      | 0.01                  | ± <0.01 | 0.03                  | ± 0.01  | 0.06                  | ± 0.02  | 0.24                  | ± 0.12  | 0.10                  | ± 0.03  |
|     | 15-epi-F <sub>2</sub> -IsoP       | ND                    | ± ND    | 0.01                  | ± <0.01 | 0.02                  | ± 0.01  | 0.08                  | ± 0.04  | 0.03                  | ± 0.01  |
|     | 15-F <sub>2</sub> -IsoP           | ND                    | ± ND    | <0.01                 | ± <0.01 | 0.01                  | ± 0.01  | 0.05                  | ± 0.02  | 0.02                  | ± <0.01 |
|     | 2,3-dinor-15-F <sub>2</sub> -IsoP | 0.01                  | ± 0.01  | ND                    | ± ND    | 0.01                  | ± <0.01 | 0.01                  | ± <0.01 | ND                    | ± ND    |
| DPA | 4-F <sub>2</sub> -NeuroP          | 0.04                  | ± 0.02  | 0.01                  | ± 0.01  | 0.01                  | ± <0.01 | 0.02                  | ± <0.01 | 0.22                  | ± 0.09  |

**Table S2.** Quantification of non-enzymatic and enzymatic oxygenated metabolites of omega-3 in Mi124, Mi133, Mi134, Mi136 and Mi168.

|                                 | Component Name                                | Mi124                 |        | Mi133                 |         | Mi134                 |         | Mi136                 |         | Mi168                 |         |
|---------------------------------|-----------------------------------------------|-----------------------|--------|-----------------------|---------|-----------------------|---------|-----------------------|---------|-----------------------|---------|
|                                 |                                               | Concentration (ng/mg) | ± SD   | Concentration (ng/mg) | ± SD    | Concentration (ng/mg) | ± SD    | Concentration (ng/mg) | ± SD    | Concentration (ng/mg) | ± SD    |
| ALA                             | 9(R)-16(R,S)-linotriins                       | 3.52                  | ± 0.92 | 6.29                  | ± 2.80  | 0.03                  | ± 0.01  | ND                    | ± ND    | ND                    | ± ND    |
|                                 | 9-F <sub>1</sub> -PhytoP                      | 0.30                  | ± 0.16 | 0.04                  | ± 0.01  | 0.16                  | ± 0.05  | 0.01                  | ± <0.01 | 0.01                  | ± <0.01 |
|                                 | ent-16-F <sub>1</sub> -PhytoP                 | 0.49                  | ± 0.12 | 0.08                  | ± 0.08  | 0.08                  | ± 0.02  | 0.01                  | ± <0.01 | 0.43                  | ± 0.02  |
|                                 | ent-16-epi-16-F <sub>1</sub> -PhytoP          | 0.40                  | ± 0.11 | 0.07                  | ± 0.05  | 0.09                  | ± 0.02  | 0.13                  | ± 0.10  | 0.32                  | ± 0.02  |
|                                 | 16B <sub>1</sub> -PhytoP                      | 0.68                  | ± 0.41 | 0.02                  | ± 0.03  | 0.25                  | ± 0.09  | 0.01                  | ± <0.01 | 0.02                  | ± <0.01 |
|                                 | 9L <sub>1</sub> -PhytoP                       | 0.58                  | ± 0.34 | 0.02                  | ± 0.02  | 0.22                  | ± 0.09  | 0.01                  | ± <0.01 | 0.02                  | ± <0.01 |
|                                 | ent-16(A)-13-epi-ST-Δ <sup>14</sup> -9-PhytoF | 0.06                  | ± 0.04 | ND                    | ± ND    | ND                    | ± ND    | 0.02                  | ± 0.01  | <0.01                 | ± <0.01 |
|                                 | ent-16(B)-13-epi-ST-Δ <sup>14</sup> -9-PhytoF | 0.15                  | ± 0.10 | ND                    | ± ND    | ND                    | ± ND    | 0.03                  | ± 0.02  | <0.01                 | ± <0.01 |
|                                 | ent-16(A)-9-epi-ST-Δ <sup>14</sup> -10-PhytoF | 0.26                  | ± 0.08 | <0.01                 | ± <0.01 | 0.10                  | ± 0.02  | 0.11                  | ± 0.07  | 0.01                  | ± <0.01 |
|                                 | ent-16(B)-9-epi-ST-Δ <sup>14</sup> -10-PhytoF | 0.40                  | ± 0.15 | 0.01                  | ± 0.01  | 0.17                  | ± 0.03  | 0.16                  | ± 0.10  | 0.01                  | ± <0.01 |
| EPA                             | ent-9(A)-12-epi-ST-Δ <sup>10</sup> -13-PhytoF | 0.14                  | ± 0.06 | ND                    | ± ND    | 0.05                  | ± 0.01  | 0.07                  | ± 0.04  | 0.01                  | ± <0.01 |
|                                 | ent-9(B)-12-epi-ST-Δ <sup>10</sup> -13-PhytoF | 0.08                  | ± 0.05 | ND                    | ± ND    | 0.02                  | ± <0.01 | 0.03                  | ± 0.02  | <0.01                 | ± <0.01 |
|                                 | 18-HEPE                                       | 2.28                  | ± 0.45 | 39.47                 | ± 14.65 | 0.30                  | ± 0.14  | 78.61                 | ± 3.10  | 39.96                 | ± 3.07  |
|                                 | 5(R)-5-F <sub>2</sub> -IsoP                   | 0.08                  | ± 0.03 | 0.20                  | ± 0.21  | 0.01                  | ± 0.01  | 2.59                  | ± 3.52  | 2.24                  | ± 0.70  |
|                                 | 5(S)-5-F <sub>2</sub> -IsoP                   | 0.03                  | ± 0.01 | 0.05                  | ± 0.06  | 0.02                  | ± <0.01 | 0.37                  | ± 0.45  | 0.69                  | ± 0.20  |
|                                 | 8(R)-8-F <sub>2</sub> -IsoP                   | ND                    | ± ND   | 0.01                  | ± 0.01  | 0.01                  | ± <0.01 | 0.13                  | ± 0.16  | 0.14                  | ± 0.04  |
|                                 | 8(S)-8-F <sub>2</sub> -IsoP                   | ND                    | ± ND   | 0.01                  | ± 0.01  | ND                    | ± ND    | 0.10                  | ± 0.13  | 0.08                  | ± 0.03  |
|                                 | 18(R)-18-F <sub>2</sub> -IsoP                 | 0.05                  | ± 0.02 | 0.03                  | ± 0.04  | 0.05                  | ± 0.02  | 0.56                  | ± 0.67  | 0.38                  | ± 0.01  |
|                                 | 18(S)-18-F <sub>2</sub> -IsoP                 | ND                    | ± ND   | 0.01                  | ± 0.02  | ND                    | ± ND    | 0.56                  | ± 0.72  | 0.18                  | ± 0.05  |
|                                 | DHA                                           | 14-HDoHE              | 7.44   | ± 1.34                | ND      | ± ND                  | 1.90    | ± 0.12                | 0.95    | ± 0.42                | 7.22    |
| 17-HDoHE                        |                                               | 45.86                 | ± 6.62 | ND                    | ± ND    | 1.58                  | ± 0.22  | 1.12                  | ± 0.30  | 11.41                 | ± 2.33  |
| RvD <sub>2</sub>                |                                               | ND                    | ± ND   | ND                    | ± ND    | ND                    | ± ND    | 0.15                  | ± 0.04  | ND                    | ± ND    |
| PdX                             |                                               | 1.26                  | ± 0.62 | ND                    | ± ND    | ND                    | ± ND    | ND                    | ± ND    | 0.10                  | ± 0.03  |
| 4(RS)-4-F <sub>4</sub> -NeuroP  |                                               | 0.12                  | ± 0.06 | 0.01                  | ± 0.01  | 0.08                  | ± 0.01  | 0.12                  | ± 0.05  | 0.17                  | ± 0.07  |
| 10(R)-F <sub>4</sub> -NeuroP    |                                               | 0.12                  | ± 0.07 | ND                    | ± ND    | 0.06                  | ± 0.01  | 0.10                  | ± 0.04  | 0.16                  | ± 0.06  |
| 10(S)-F <sub>4</sub> -NeuroP    |                                               | 0.07                  | ± 0.04 | ND                    | ± ND    | 0.03                  | ± 0.01  | 0.05                  | ± 0.02  | 0.09                  | ± 0.04  |
| 13(A)-13-F <sub>4</sub> -NeuroP |                                               | 0.13                  | ± 0.08 | ND                    | ± ND    | 0.10                  | ± 0.01  | 0.11                  | ± 0.04  | 0.16                  | ± 0.06  |
| 13(B)-13-F <sub>4</sub> -NeuroP |                                               | 0.16                  | ± 0.09 | ND                    | ± ND    | 0.07                  | ± 0.02  | 0.11                  | ± 0.03  | 0.16                  | ± 0.06  |
| 14(R)-14-F <sub>4</sub> -NeuroP |                                               | 0.04                  | ± 0.02 | ND                    | ± ND    | 0.03                  | ± 0.01  | 0.04                  | ± 0.01  | 0.06                  | ± 0.02  |

The measured ER, ME and PE at high concentrations are available as Supplementary Materials, Table S3 for Mi124, Table S4 for Mi133, Table S5 for Mi134, Table S6 for Mi136 and Table S7 for Mi168.

**Table S3.** The efficiency of sample preparation of Mi124 with the extraction recovery (ER), the matrix effect (ME) and the global process efficiency (PE).

| Compound                                      | Concentration (ng/mL) | Extraction recovery (ER) | ± | SD     | Matrix Effect (ME) | ± | SD    | Process Efficiency (PE) | ± | SD     |
|-----------------------------------------------|-----------------------|--------------------------|---|--------|--------------------|---|-------|-------------------------|---|--------|
| D4-10(R)-10F <sub>4t</sub> -NeuroP            | 40                    | 38.91%                   | ± | 17.37% | 59.81%             | ± | 6.78% | 23.27%                  | ± | 17.02% |
| D4-15-F <sub>2t</sub> -IsoP                   | 40                    | 35.29%                   | ± | 15.60% | 70.07%             | ± | 4.78% | 24.73%                  | ± | 16.71% |
| C21 15F <sub>2t</sub> -IsoP                   | 40                    | 41.01%                   | ± | 17.79% | 62.12%             | ± | 6.22% | 25.47%                  | ± | 17.77% |
| C19 16-F <sub>1t</sub> -PhytoP                | 40                    | 38.13%                   | ± | 17.93% | 62.67%             | ± | 6.56% | 23.90%                  | ± | 15.96% |
| 15-A <sub>2t</sub> -IsoP                      | 200                   | 0.88%                    | ± | 28.40% | 50.28%             | ± | 3.23% | 0.44%                   | ± | 26.20% |
| 5(RS)-5-F <sub>2c</sub> -IsoP                 | 200                   | 54.64%                   | ± | 9.01%  | 73.44%             | ± | 4.56% | 40.12%                  | ± | 5.06%  |
| 5(RS)-5-F <sub>2t</sub> -IsoP                 | 200                   | 64.03%                   | ± | 8.87%  | 71.78%             | ± | 6.17% | 45.96%                  | ± | 3.70%  |
| 2,3-dinor-15-F <sub>2t</sub> -IsoP            | 200                   | 52.43%                   | ± | 13.53% | 80.73%             | ± | 9.98% | 42.33%                  | ± | 5.29%  |
| 4-F <sub>3t</sub> -NeuroP                     | 200                   | 58.05%                   | ± | 13.36% | 58.37%             | ± | 4.68% | 33.89%                  | ± | 9.36%  |
| 9-F <sub>1t</sub> -PhytoP                     | 200                   | 45.92%                   | ± | 9.78%  | 80.86%             | ± | 5.13% | 37.13%                  | ± | 6.25%  |
| ent-16-epi-16-F <sub>1t</sub> -PhytoP         | 200                   | 48.77%                   | ± | 8.90%  | 76.89%             | ± | 4.12% | 37.50%                  | ± | 6.56%  |
| ent-16-F <sub>1t</sub> -PhytoP                | 200                   | 46.65%                   | ± | 12.63% | 49.03%             | ± | 5.71% | 22.87%                  | ± | 9.40%  |
| 16B <sub>1t</sub> -PhytoP                     | 200                   | 51.80%                   | ± | 10.72% | 65.66%             | ± | 4.42% | 34.01%                  | ± | 6.82%  |
| 9L <sub>1t</sub> -PhytoP                      | 200                   | 79.74%                   | ± | 9.64%  | 72.21%             | ± | 4.42% | 57.58%                  | ± | 6.55%  |
| ent-16(A)-13-epi-ST-Δ <sup>14</sup> -9-PhytoF | 200                   | 45.81%                   | ± | 7.02%  | 82.34%             | ± | 3.94% | 37.72%                  | ± | 5.58%  |
| ent-16(B)-13-epi-ST-Δ <sup>14</sup> -9-PhytoF | 200                   | 43.82%                   | ± | 8.77%  | 83.15%             | ± | 4.34% | 36.43%                  | ± | 8.08%  |
| ent-16(A)-9-epi-ST-Δ <sup>14</sup> -10-PhytoF | 200                   | 47.71%                   | ± | 12.22% | 74.13%             | ± | 4.88% | 35.37%                  | ± | 9.79%  |
| ent-16(B)-9-epi-ST-Δ <sup>14</sup> -10-PhytoF | 200                   | 49.56%                   | ± | 7.57%  | 17.60%             | ± | 4.75% | 8.72%                   | ± | 6.09%  |
| ent-9(A)-12-epi-ST-Δ <sup>10</sup> -13-PhytoF | 200                   | 44.02%                   | ± | 8.72%  | 80.75%             | ± | 3.19% | 35.55%                  | ± | 7.13%  |
| ent-9(B)-12-epi-ST-Δ <sup>10</sup> -13-PhytoF | 200                   | 44.30%                   | ± | 8.73%  | 81.71%             | ± | 5.88% | 36.20%                  | ± | 7.07%  |
| 5(R)-5-F <sub>3t</sub> -IsoP                  | 200                   | 95.73%                   | ± | 10.87% | 42.29%             | ± | 9.38% | 40.48%                  | ± | 8.55%  |
| 5(S)-5-F <sub>3t</sub> -IsoP                  | 200                   | 64.96%                   | ± | 10.33% | 73.36%             | ± | 6.11% | 47.65%                  | ± | 7.44%  |
| 18(R)-18-F <sub>3t</sub> -IsoP                | 200                   | 52.56%                   | ± | 8.17%  | 87.09%             | ± | 4.59% | 45.77%                  | ± | 6.43%  |
| 4(RS)-4-F <sub>4t</sub> -NeuroP               | 200                   | 52.65%                   | ± | 12.20% | 68.02%             | ± | 4.61% | 35.81%                  | ± | 8.28%  |
| 10(R)-F <sub>4t</sub> -NeuroP                 | 200                   | 53.23%                   | ± | 10.94% | 73.78%             | ± | 5.44% | 39.28%                  | ± | 6.88%  |
| 10(S)-F <sub>4t</sub> -NeuroP                 | 200                   | 51.27%                   | ± | 12.51% | 55.04%             | ± | 7.90% | 28.22%                  | ± | 7.58%  |
| 13(A)-13-F <sub>4t</sub> -NeuroP              | 200                   | 53.43%                   | ± | 9.87%  | 73.35%             | ± | 5.35% | 39.19%                  | ± | 6.60%  |
| 13(B)-13-F <sub>4t</sub> -NeuroP              | 200                   | 50.37%                   | ± | 13.46% | 56.89%             | ± | 5.81% | 28.65%                  | ± | 8.51%  |
| 14(S)-14-F <sub>4t</sub> -NeuroP              | 200                   | 50.56%                   | ± | 11.36% | 64.50%             | ± | 7.07% | 32.61%                  | ± | 6.43%  |
| 14(S)-14-F <sub>4t</sub> -NeuroP              | 200                   | 50.15%                   | ± | 10.07% | 61.38%             | ± | 5.65% | 30.78%                  | ± | 4.94%  |
| 20(R)-20-F <sub>4t</sub> -NeuroP              | 200                   | 49.07%                   | ± | 11.22% | 71.90%             | ± | 7.18% | 35.28%                  | ± | 8.37%  |

**Table S4.** The efficiency of sample preparation of Mi133 with the extraction recovery (ER), the matrix effect (ME) and the global process efficiency (PE).

| Compound                                      | Concentration (ng/mL) | Extraction recovery (ER) | ± | SD    | Matrix Effect (ME) | ± | SD     | Process Efficiency (PE) | ± | SD    |
|-----------------------------------------------|-----------------------|--------------------------|---|-------|--------------------|---|--------|-------------------------|---|-------|
| D4-10(R)-10F <sub>4t</sub> -NeuroP            | 40                    | 80.67%                   | ± | 7.55% | 71.09%             | ± | 7.04%  | 57.35%                  | ± | 6.93% |
| D4-15-F <sub>2t</sub> -IsoP                   | 40                    | 74.52%                   | ± | 6.75% | 71.43%             | ± | 6.22%  | 53.23%                  | ± | 6.42% |
| C21 15F <sub>2t</sub> -IsoP                   | 40                    | 87.92%                   | ± | 6.74% | 66.22%             | ± | 5.82%  | 58.22%                  | ± | 7.12% |
| C19 16-F <sub>1t</sub> -PhytoP                | 40                    | 76.38%                   | ± | 5.51% | 79.48%             | ± | 4.56%  | 60.71%                  | ± | 5.53% |
| 15-A <sub>2t</sub> -IsoP                      | 200                   | -23.79%                  | ± | 8.76% | 40.82%             | ± | 14.24% | -9.71%                  | ± | 0.01% |
| 5(RS)-5-F <sub>2c</sub> -IsoP                 | 200                   | 88.89%                   | ± | 9.55% | 104.26%            | ± | 6.24%  | 92.68%                  | ± | 3.91% |
| 5(RS)-5-F <sub>2t</sub> -IsoP                 | 200                   | 89.63%                   | ± | 5.22% | 58.16%             | ± | 4.95%  | 52.13%                  | ± | 1.28% |
| 15-epi-F <sub>2t</sub> -IsoP                  | 200                   | 147.08%                  | ± | 4.54% | 41.06%             | ± | 2.18%  | 60.39%                  | ± | 3.86% |
| 2,3-dinor-15-F <sub>2t</sub> -IsoP            | 200                   | 65.05%                   | ± | 1.87% | 86.64%             | ± | 2.44%  | 56.36%                  | ± | 1.17% |
| 4-F <sub>3t</sub> -NeuroP                     | 200                   | 81.56%                   | ± | 6.64% | 92.24%             | ± | 7.54%  | 50.52%                  | ± | 3.54% |
| 9-F <sub>1t</sub> -PhytoP                     | 200                   | 65.83%                   | ± | 2.33% | 87.22%             | ± | 2.44%  | 57.42%                  | ± | 1.50% |
| ent-16-F <sub>1t</sub> -PhytoP                | 200                   | 70.85%                   | ± | 3.35% | 78.60%             | ± | 3.20%  | 55.69%                  | ± | 2.63% |
| ent-16-epi-16-F <sub>1t</sub> -PhytoP         | 200                   | 66.80%                   | ± | 2.81% | 81.03%             | ± | 2.45%  | 54.13%                  | ± | 2.13% |
| 16B <sub>1t</sub> -PhytoP                     | 200                   | 75.58%                   | ± | 3.89% | 77.32%             | ± | 2.56%  | 58.44%                  | ± | 1.85% |
| 9L <sub>1t</sub> -PhytoP                      | 200                   | 103.72%                  | ± | 2.98% | 79.65%             | ± | 2.42%  | 82.62%                  | ± | 1.89% |
| ent-16(A)-9-epi-ST-Δ <sup>14</sup> -10-PhytoF | 200                   | 67.98%                   | ± | 2.87% | 84.45%             | ± | 3.40%  | 57.41%                  | ± | 1.92% |
| ent-16(B)-9-epi-ST-Δ <sup>14</sup> -10-PhytoF | 200                   | 67.18%                   | ± | 3.33% | 91.24%             | ± | 4.05%  | 61.29%                  | ± | 2.55% |
| 5(R)-5-F <sub>3t</sub> -IsoP                  | 200                   | 160.07%                  | ± | 9.97% | 54.38%             | ± | 11.14% | 87.05%                  | ± | 5.89% |
| 5(S)-5-F <sub>3t</sub> -IsoP                  | 200                   | 87.57%                   | ± | 9.44% | 41.63%             | ± | 8.66%  | 36.45%                  | ± | 4.00% |
| 8(R)-8-F <sub>3t</sub> -IsoP                  | 200                   | 71.63%                   | ± | 4.23% | 79.59%             | ± | 3.91%  | 57.01%                  | ± | 1.47% |
| 8(S)-8-F <sub>3t</sub> -IsoP                  | 200                   | 68.77%                   | ± | 3.69% | 82.92%             | ± | 2.98%  | 57.03%                  | ± | 2.36% |
| 18(R)-18-F <sub>3t</sub> -IsoP                | 200                   | 72.48%                   | ± | 5.71% | 72.27%             | ± | 5.40%  | 52.38%                  | ± | 3.17% |
| 4(RS)-4-F <sub>4t</sub> -NeuroP               | 200                   | 78.15%                   | ± | 3.15% | 76.29%             | ± | 2.69%  | 59.62%                  | ± | 1.13% |

**Table S5.** The efficiency of sample preparation of Mi134 with the extraction recovery (ER), the matrix effect (ME) and the global process efficiency (PE).

| Compound                                                       | Concentration (ng/mL) | Extraction Recovery (ER) | ± | SD     | Matrix Effect (ME) | ± | SD     | Process Efficiency (PE) | ± | SD     |
|----------------------------------------------------------------|-----------------------|--------------------------|---|--------|--------------------|---|--------|-------------------------|---|--------|
| D4-10(R)-10F <sub>4t</sub> -NeuroP                             | 40                    | 55.54%                   | ± | 8.38%  | 54.81%             | ± | 7.14%  | 30.44%                  | ± | 7.66%  |
| D4-15-F <sub>2t</sub> -IsoP                                    | 40                    | 42.87%                   | ± | 6.53%  | 65.08%             | ± | 4.49%  | 27.90%                  | ± | 7.93%  |
| C21 15F <sub>2t</sub> -IsoP                                    | 40                    | 52.93%                   | ± | 7.91%  | 59.89%             | ± | 6.77%  | 31.70%                  | ± | 7.35%  |
| C19 16-F <sub>1t</sub> -PhytoP                                 | 40                    | 37.62%                   | ± | 6.82%  | 62.49%             | ± | 5.51%  | 23.51%                  | ± | 5.89%  |
| 5(RS)-5-F <sub>2c</sub> -IsoP                                  | 200                   | 42.23%                   | ± | 21.23% | 66.73%             | ± | 9.58%  | 28.18%                  | ± | 12.26% |
| 5(RS)-5-F <sub>2t</sub> -IsoP                                  | 200                   | 49.78%                   | ± | 22.63% | 60.39%             | ± | 11.91% | 30.06%                  | ± | 11.72% |
| 15- <i>epi</i> -F <sub>2t</sub> -IsoP                          | 200                   | 37.06%                   | ± | 16.36% | 59.49%             | ± | 7.82%  | 22.05%                  | ± | 10.04% |
| 15(RS)-15-F <sub>2t</sub> -IsoP                                | 200                   | 41.84%                   | ± | 17.09% | 69.97%             | ± | 5.98%  | 29.27%                  | ± | 12.45% |
| 2,3- <i>dinor</i> -15-F <sub>2t</sub> -IsoP                    | 200                   | 36.26%                   | ± | 18.34% | 77.73%             | ± | 6.00%  | 28.19%                  | ± | 14.07% |
| 4-F <sub>3t</sub> -NeuroP                                      | 200                   | 56.41%                   | ± | 19.57% | 48.37%             | ± | 12.46% | 27.29%                  | ± | 7.80%  |
| 9-F <sub>1t</sub> -PhytoP                                      | 200                   | 29.75%                   | ± | 18.83% | 81.36%             | ± | 3.39%  | 24.20%                  | ± | 17.04% |
| <i>ent</i> -16-F <sub>1t</sub> -PhytoP                         | 200                   | 32.78%                   | ± | 21.35% | 77.42%             | ± | 8.09%  | 25.38%                  | ± | 15.74% |
| <i>ent</i> -16- <i>epi</i> -16-F <sub>1t</sub> -PhytoP         | 200                   | 31.57%                   | ± | 18.34% | 80.52%             | ± | 4.66%  | 25.42%                  | ± | 15.45% |
| 16B <sub>1t</sub> -PhytoP                                      | 200                   | 44.10%                   | ± | 17.67% | 70.42%             | ± | 5.92%  | 31.06%                  | ± | 12.27% |
| 9L <sub>1t</sub> -PhytoP                                       | 200                   | 65.16%                   | ± | 13.99% | 99.10%             | ± | 8.09%  | 65.16%                  | ± | 13.99% |
| <i>ent</i> -16(A)-9- <i>epi</i> -ST-Δ <sup>14</sup> -10-PhytoF | 200                   | 32.00%                   | ± | 25.01% | 72.15%             | ± | 6.30%  | 23.09%                  | ± | 21.15% |
| <i>ent</i> -16(B)-9- <i>epi</i> -ST-Δ <sup>14</sup> -10-PhytoF | 200                   | 28.82%                   | ± | 24.28% | 79.68%             | ± | 3.11%  | 22.96%                  | ± | 24.44% |
| <i>ent</i> -9(A)-12- <i>epi</i> -ST-Δ <sup>10</sup> -13-PhytoF | 200                   | 32.41%                   | ± | 19.87% | 75.76%             | ± | 4.54%  | 24.55%                  | ± | 16.93% |
| <i>ent</i> -9(B)-12- <i>epi</i> -ST-Δ <sup>10</sup> -13-PhytoF | 200                   | 31.91%                   | ± | 19.57% | 70.56%             | ± | 7.81%  | 22.52%                  | ± | 15.97% |
| 5(S)-5-F <sub>3t</sub> -IsoP                                   | 200                   | 46.04%                   | ± | 22.36% | 73.67%             | ± | 9.70%  | 33.92%                  | ± | 15.89% |
| 8(R)-8-F <sub>3t</sub> -IsoP                                   | 200                   | 34.49%                   | ± | 19.06% | 53.79%             | ± | 8.10%  | 18.55%                  | ± | 12.11% |
| 18(R)-18-F <sub>3t</sub> -IsoP                                 | 200                   | 39.56%                   | ± | 21.55% | 76.86%             | ± | 8.09%  | 30.41%                  | ± | 16.32% |
| 4(RS)-4-F <sub>4t</sub> -NeuroP                                | 200                   | 42.01%                   | ± | 19.03% | 66.63%             | ± | 7.13%  | 27.99%                  | ± | 12.59% |
| 10(R)-F <sub>4t</sub> -NeuroP                                  | 200                   | 44.52%                   | ± | 18.14% | 68.41%             | ± | 7.67%  | 30.45%                  | ± | 11.86% |
| 10(S)-F <sub>4t</sub> -NeuroP                                  | 200                   | 39.87%                   | ± | 16.43% | 64.27%             | ± | 8.74%  | 25.63%                  | ± | 10.67% |
| 13(A)-13-F <sub>4t</sub> -NeuroP                               | 200                   | 50.35%                   | ± | 22.67% | 64.16%             | ± | 11.79% | 32.30%                  | ± | 12.96% |
| 13(B)-13-F <sub>4t</sub> -NeuroP                               | 200                   | 38.74%                   | ± | 24.05% | 67.53%             | ± | 10.88% | 26.16%                  | ± | 14.03% |
| 14(R)-14-F <sub>4t</sub> -NeuroP                               | 200                   | 44.64%                   | ± | 19.04% | 61.02%             | ± | 11.20% | 27.24%                  | ± | 9.98%  |
| 14(S)-14-F <sub>4t</sub> -NeuroP                               | 200                   | 50.15%                   | ± | 10.07% | 61.38%             | ± | 5.65%  | 30.78%                  | ± | 4.94%  |
| 20(R)-20-F <sub>4t</sub> -NeuroP                               | 200                   | 50.00%                   | ± | 25.04% | 61.55%             | ± | 16.56% | 30.78%                  | ± | 12.80% |
| 20(S)-20-F <sub>4t</sub> -NeuroP                               | 200                   | 45.89%                   | ± | 19.81% | 64.93%             | ± | 10.39% | 29.80%                  | ± | 10.13% |

**Table S6.** The efficiency of sample preparation of Mi136 with the extraction recovery (ER), the matrix effect (ME) and the global process efficiency (PE).

| Compound                                                       | Concentration (ng/mL) | Extraction Recovery (ER) | ± | SD      | Matrix Effect (ME) | ± | SD      | Process Efficiency (PE) | ± | SD      |
|----------------------------------------------------------------|-----------------------|--------------------------|---|---------|--------------------|---|---------|-------------------------|---|---------|
| D4-10(R)-10F <sub>4t</sub> -NeuroP                             | 40                    | 82.07%                   | ± | 4.21%   | 51.93%             | ± | 4.91%   | 42.62%                  | ± | 5.72%   |
| D4-15-F <sub>2t</sub> -IsoP                                    | 40                    | 78.51%                   | ± | 5.83%   | 50.73%             | ± | 5.49%   | 39.83%                  | ± | 6.22%   |
| C21 15F <sub>2t</sub> -IsoP                                    | 40                    | 90.87%                   | ± | 4.54%   | 55.11%             | ± | 4.91%   | 50.08%                  | ± | 5.83%   |
| C19 16-F <sub>1t</sub> -PhytoP                                 | 40                    | 76.65%                   | ± | 4.27%   | 60.82%             | ± | 3.75%   | 46.62%                  | ± | 5.11%   |
| 15-A <sub>2t</sub> -IsoP                                       | 200                   | 68.81%                   | ± | 17.28%  | 89.51%             | ± | 12.58%  | 61.59%                  | ± | 5.72%   |
| 5(RS)-5-F <sub>2c</sub> -IsoP                                  | 200                   | 81.15%                   | ± | 12.65%  | 37.35%             | ± | 10.39%  | 30.31%                  | ± | 2.87%   |
| 5(RS)-5-F <sub>2t</sub> -IsoP                                  | 200                   | 98.67%                   | ± | 12.21%  | 43.11%             | ± | 9.65%   | 42.54%                  | ± | 3.57%   |
| 15- <i>epi</i> -F <sub>2t</sub> -IsoP                          | 200                   | 82.79%                   | ± | 9.39%   | 33.69%             | ± | 7.53%   | 27.89%                  | ± | 3.36%   |
| 15(RS)-15-F <sub>2t</sub> -IsoP                                | 200                   | 79.10%                   | ± | 10.33%  | 39.76%             | ± | 8.37%   | 31.45%                  | ± | 3.30%   |
| 2,3- <i>dinor</i> -15-F <sub>2t</sub> -IsoP                    | 200                   | 69.04%                   | ± | 11.82%  | 81.33%             | ± | 11.71%  | 56.15%                  | ± | 7.21%   |
| 4-F <sub>3t</sub> -NeuroP                                      | 200                   | 113.11%                  | ± | -58.42% | -0.14%             | ± | -13.89% | -0.14%                  | ± | 13.89%  |
| 9-F <sub>1t</sub> -PhytoP                                      | 200                   | 62.59%                   | ± | 15.14%  | 50.80%             | ± | 9.21%   | 31.79%                  | ± | 7.53%   |
| <i>ent</i> -16- <i>epi</i> -16-F <sub>1t</sub> -PhytoP         | 200                   | 62.09%                   | ± | 16.16%  | 52.12%             | ± | 9.34%   | 32.36%                  | ± | 8.58%   |
| <i>ent</i> -16-F <sub>1t</sub> -PhytoP                         | 200                   | 60.97%                   | ± | 13.78%  | 37.76%             | ± | 9.00%   | 23.02%                  | ± | 7.26%   |
| 16B <sub>1t</sub> -PhytoP                                      | 200                   | 79.07%                   | ± | 13.18%  | 45.73%             | ± | 9.45%   | 36.16%                  | ± | 4.24%   |
| 9L <sub>1t</sub> -PhytoP                                       | 200                   | 107.07%                  | ± | 11.38%  | 48.20%             | ± | 8.78%   | 51.61%                  | ± | 3.93%   |
| <i>ent</i> -16(A)-13- <i>epi</i> -ST-Δ <sup>14</sup> -9-PhytoF | 200                   | 52.89%                   | ± | 16.44%  | 33.31%             | ± | 10.72%  | 17.62%                  | ± | 13.14%  |
| <i>ent</i> -16(B)-13- <i>epi</i> -ST-Δ <sup>14</sup> -9-PhytoF | 200                   | 55.01%                   | ± | 16.85%  | 43.47%             | ± | 11.73%  | 23.92%                  | ± | 12.55%  |
| <i>ent</i> -16(A)-9- <i>epi</i> -ST-Δ <sup>14</sup> -10-PhytoF | 200                   | 58.07%                   | ± | 17.30%  | 49.31%             | ± | 9.03%   | 28.63%                  | ± | 10.73%  |
| <i>ent</i> -16(B)-9- <i>epi</i> -ST-Δ <sup>14</sup> -10-PhytoF | 200                   | 59.93%                   | ± | 17.94%  | 51.42%             | ± | 9.48%   | 30.81%                  | ± | 11.74%  |
| <i>ent</i> -9(A)-12- <i>epi</i> -ST-Δ <sup>10</sup> -13-PhytoF | 200                   | 52.88%                   | ± | 19.14%  | 48.01%             | ± | 8.80%   | 25.39%                  | ± | 11.93%  |
| <i>ent</i> -9(B)-12- <i>epi</i> -ST-Δ <sup>10</sup> -13-PhytoF | 200                   | 53.34%                   | ± | 19.24%  | 45.23%             | ± | 11.07%  | 24.12%                  | ± | 12.39%  |
| 5(R)-5-F <sub>3t</sub> -IsoP                                   | 200                   | 172.34%                  | ± | 190.74% | 4.75%              | ± | 77.42%  | 8.19%                   | ± | 120.38% |
| 5(S)-5-F <sub>3t</sub> -IsoP                                   | 200                   | 58.68%                   | ± | 36.37%  | 58.57%             | ± | 18.26%  | 34.37%                  | ± | 21.34%  |
| 8(R)-8-F <sub>3t</sub> -IsoP                                   | 200                   | 78.97%                   | ± | 12.33%  | 42.01%             | ± | 9.01%   | 33.17%                  | ± | 4.47%   |
| 8(S)-8-F <sub>3t</sub> -IsoP                                   | 200                   | 75.60%                   | ± | 12.59%  | 44.72%             | ± | 9.41%   | 33.81%                  | ± | 4.84%   |
| 18(R)-18-F <sub>3t</sub> -IsoP                                 | 200                   | 74.84%                   | ± | 21.46%  | 47.51%             | ± | 11.23%  | 35.56%                  | ± | 13.08%  |
| 18(S)-18-F <sub>3t</sub> -IsoP                                 | 200                   | 74.34%                   | ± | 14.29%  | 41.40%             | ± | 10.53%  | 30.77%                  | ± | 5.33%   |
| 4(RS)-4-F <sub>4t</sub> -NeuroP                                | 200                   | 85.45%                   | ± | 9.81%   | 37.52%             | ± | 8.25%   | 32.06%                  | ± | 2.24%   |
| 10(R)-F <sub>4t</sub> -NeuroP                                  | 200                   | 85.66%                   | ± | 11.47%  | 48.81%             | ± | 9.42%   | 41.81%                  | ± | 3.44%   |
| 10(S)-F <sub>4t</sub> -NeuroP                                  | 200                   | 78.84%                   | ± | 12.45%  | 44.68%             | ± | 10.54%  | 35.22%                  | ± | 4.89%   |
| 13(A)-13-F <sub>4t</sub> -NeuroP                               | 200                   | 91.37%                   | ± | 11.19%  | 42.67%             | ± | 9.56%   | 38.98%                  | ± | 3.71%   |
| 13(B)-13-F <sub>4t</sub> -NeuroP                               | 200                   | 84.34%                   | ± | 13.67%  | 41.66%             | ± | 10.81%  | 35.14%                  | ± | 3.72%   |
| 14(R)-14-F <sub>4t</sub> -NeuroP                               | 200                   | 82.12%                   | ± | 10.59%  | 40.70%             | ± | 9.45%   | 33.42%                  | ± | 3.28%   |
| 14(S)-14-F <sub>4t</sub> -NeuroP                               | 200                   | 82.11%                   | ± | 9.39%   | 39.83%             | ± | 8.53%   | 32.70%                  | ± | 1.38%   |
| 20(R)-20-F <sub>4t</sub> -NeuroP                               | 200                   | 78.31%                   | ± | 11.99%  | 45.13%             | ± | 10.90%  | 35.34%                  | ± | 5.41%   |
| 20(S)-20-F <sub>4t</sub> -NeuroP                               | 200                   | 83.12%                   | ± | 11.69%  | 44.84%             | ± | 9.65%   | 37.28%                  | ± | 2.75%   |

**Table S7.** The efficiency of sample preparation of Mi168 with the extraction recovery (ER), the matrix effect (ME) and the global process efficiency (PE).

| Compound                                                       | Concentration<br>(ng/mL) | Extraction Recovery<br>(ER) | ± | SD     | Matrix Effect<br>(ME) | ± | SD     | Process Efficiency<br>(PE) | ± | SD     |
|----------------------------------------------------------------|--------------------------|-----------------------------|---|--------|-----------------------|---|--------|----------------------------|---|--------|
| D4-10(R)-10F <sub>4t</sub> -NeuroP                             | 40                       | 51.10%                      | ± | 6.87%  | 88.90%                | ± | 5.80%  | 45.43%                     | ± | 7.50%  |
| D4-15-F <sub>2t</sub> -IsoP                                    | 40                       | 43.52%                      | ± | 5.21%  | 78.45%                | ± | 5.04%  | 34.14%                     | ± | 6.06%  |
| C21 15F <sub>2t</sub> -IsoP                                    | 40                       | 46.43%                      | ± | 5.91%  | 89.91%                | ± | 5.30%  | 41.74%                     | ± | 6.81%  |
| C19 16-F <sub>1t</sub> -PhytoP                                 | 40                       | 42.30%                      | ± | 6.32%  | 84.63%                | ± | 4.53%  | 35.80%                     | ± | 6.38%  |
| 15-A <sub>2t</sub> -IsoP                                       | 200                      | 0.18%                       | ± | 46.31% | 45.88%                | ± | 6.21%  | 0.08%                      | ± | 41.12% |
| 5(RS)-5-F <sub>2c</sub> -IsoP                                  | 200                      | 45.40%                      | ± | 6.22%  | 87.24%                | ± | 2.29%  | 39.61%                     | ± | 4.54%  |
| 5(RS)-5-F <sub>2t</sub> -IsoP                                  | 200                      | 68.78%                      | ± | 6.54%  | 88.22%                | ± | 3.06%  | 60.68%                     | ± | 4.49%  |
| 15- <i>epi</i> -F <sub>2t</sub> -IsoP                          | 200                      | 46.12%                      | ± | 4.61%  | 76.88%                | ± | 1.63%  | 35.46%                     | ± | 4.48%  |
| 15(RS)-15-F <sub>2t</sub> -IsoP                                | 200                      | 48.31%                      | ± | 4.63%  | 82.66%                | ± | 2.09%  | 39.94%                     | ± | 3.89%  |
| 4-F <sub>3t</sub> -NeuroP                                      | 200                      | 66.12%                      | ± | 7.80%  | 79.63%                | ± | 2.48%  | 52.65%                     | ± | 6.00%  |
| 9-F <sub>1t</sub> -PhytoP                                      | 200                      | 36.03%                      | ± | 5.34%  | 85.09%                | ± | 2.98%  | 30.66%                     | ± | 3.97%  |
| <i>ent</i> -16- <i>epi</i> -16-F <sub>1t</sub> -PhytoP         | 200                      | 35.51%                      | ± | 6.38%  | 89.44%                | ± | 2.84%  | 31.76%                     | ± | 5.31%  |
| <i>ent</i> -16-F <sub>1t</sub> -PhytoP                         | 200                      | 40.69%                      | ± | 5.97%  | 93.42%                | ± | 3.43%  | 38.01%                     | ± | 5.03%  |
| 16B <sub>1t</sub> -PhytoP                                      | 200                      | 65.97%                      | ± | 7.17%  | 86.07%                | ± | 1.59%  | 56.78%                     | ± | 6.10%  |
| 9L <sub>1t</sub> -PhytoP                                       | 200                      | 92.23%                      | ± | 5.08%  | 88.92%                | ± | 1.67%  | 82.02%                     | ± | 4.73%  |
| <i>ent</i> -16(A)-13- <i>epi</i> -ST-Δ <sup>14</sup> -9-PhytoF | 200                      | 61.33%                      | ± | 7.74%  | 84.47%                | ± | 3.23%  | 51.80%                     | ± | 7.00%  |
| <i>ent</i> -16(B)-13- <i>epi</i> -ST-Δ <sup>14</sup> -9-PhytoF | 200                      | 60.39%                      | ± | 7.17%  | 87.43%                | ± | 2.56%  | 52.80%                     | ± | 8.27%  |
| <i>ent</i> -16(A)-9- <i>epi</i> -ST-Δ <sup>14</sup> -10-PhytoF | 200                      | 57.74%                      | ± | 6.36%  | 81.58%                | ± | 2.34%  | 47.10%                     | ± | 6.47%  |
| <i>ent</i> -9(A)-12- <i>epi</i> -ST-Δ <sup>10</sup> -13-PhytoF | 200                      | 59.67%                      | ± | 7.66%  | 82.83%                | ± | 2.32%  | 49.43%                     | ± | 6.94%  |
| <i>ent</i> -9(B)-12- <i>epi</i> -ST-Δ <sup>10</sup> -13-PhytoF | 200                      | 59.56%                      | ± | 7.21%  | 81.96%                | ± | 2.92%  | 48.82%                     | ± | 8.51%  |
| 5(R)-5-F <sub>3t</sub> -IsoP                                   | 200                      | 114.06%                     | ± | 10.48% | 53.15%                | ± | 7.48%  | 60.63%                     | ± | 10.06% |
| 5(S)-5-F <sub>3t</sub> -IsoP                                   | 200                      | 55.58%                      | ± | 13.08% | 79.99%                | ± | 10.81% | 44.46%                     | ± | 5.50%  |
| 8(R)-8-F <sub>3t</sub> -IsoP                                   | 200                      | 54.22%                      | ± | 6.97%  | 84.56%                | ± | 2.32%  | 45.85%                     | ± | 5.79%  |
| 8(S)-8-F <sub>3t</sub> -IsoP                                   | 200                      | 50.15%                      | ± | 4.87%  | 83.39%                | ± | 1.45%  | 41.82%                     | ± | 5.07%  |
| 18(R)-18-F <sub>3t</sub> -IsoP                                 | 200                      | 49.47%                      | ± | 5.76%  | 88.98%                | ± | 3.53%  | 44.02%                     | ± | 5.08%  |
| 18(S)-18-F <sub>3t</sub> -IsoP                                 | 200                      | 44.20%                      | ± | 6.84%  | 88.08%                | ± | 2.72%  | 38.93%                     | ± | 5.68%  |
| 4(RS)-4-F <sub>4t</sub> -NeuroP                                | 200                      | 63.96%                      | ± | 7.57%  | 85.18%                | ± | 2.05%  | 54.48%                     | ± | 6.20%  |
| 10(R)-F <sub>4t</sub> -NeuroP                                  | 200                      | 59.77%                      | ± | 6.36%  | 93.16%                | ± | 2.25%  | 55.68%                     | ± | 5.49%  |
| 10(S)-F <sub>4t</sub> -NeuroP                                  | 200                      | 51.96%                      | ± | 5.34%  | 88.68%                | ± | 3.08%  | 46.08%                     | ± | 5.23%  |
| 13(A)-13-F <sub>4t</sub> -NeuroP                               | 200                      | 55.79%                      | ± | 5.19%  | 87.28%                | ± | 2.32%  | 48.69%                     | ± | 4.95%  |
| 13(B)-13-F <sub>4t</sub> -NeuroP                               | 200                      | 55.92%                      | ± | 7.34%  | 81.47%                | ± | 1.74%  | 45.56%                     | ± | 6.46%  |
| 14(R)-14-F <sub>4t</sub> -NeuroP                               | 200                      | 56.11%                      | ± | 6.73%  | 87.36%                | ± | 3.01%  | 49.02%                     | ± | 5.85%  |
| 14(S)-14-F <sub>4t</sub> -NeuroP                               | 200                      | 59.17%                      | ± | 6.51%  | 79.60%                | ± | 2.16%  | 47.10%                     | ± | 4.87%  |
| 20(R)-20-F <sub>4t</sub> -NeuroP                               | 200                      | 46.61%                      | ± | 4.18%  | 82.86%                | ± | 2.96%  | 38.62%                     | ± | 5.55%  |
| 20(S)-20-F <sub>4t</sub> -NeuroP                               | 200                      | 44.93%                      | ± | 4.02%  | 81.30%                | ± | 1.30%  | 36.53%                     | ± | 3.27%  |
